# Supplementary material for: Fast self-replenishing slippery surfaces with a 3D fibrous porous network for the healing of surface properties
Source: Royal Society of Chemistry journal article supplement (doi:10.1039/c9ta08133j), 2019-01-01
Supplement: c9ta08133j1.pdf [file c9ta08133j1.pdf]

Electronic Supplementary Material (ESI) for Journal of Materials Chemistry A.  
This journal is © The Royal Society of Chemistry 2018

## Supporting Information

### **Fast Self-Replenishing Slippery Surfaces with 3D Fibrous Porous Network for the Healing of Surface Properties**

*Minglong Yan,<sup>ab</sup> Chunhong Zhang,<sup>ab</sup> Rongrong Chen,<sup>\*ab</sup> Qi Liu,<sup>ab</sup> Jingyuan Liu,<sup>ab</sup> Jing Yu,<sup>ab</sup>  
Liangtian Gao,<sup>c</sup> Gaohui Sun<sup>b</sup> and JunWang<sup>\*ab</sup>*

<sup>a</sup>Key Laboratory of Superlight Materials and Surface Technology, Ministry of Education.  
Harbin 150001, P. R. China

<sup>b</sup>College of Materials Science and Chemical Engineering, Harbin Engineering University.  
Harbin 150001, P. R. China

<sup>c</sup>College of shipbuilding Engineering, Harbin Engineering University, Harbin 150001, P. R.  
China.

\*Correspondence authors: China E-mail: chenrongrong95@163.com; zhqw1888@sohu.com

## Figures and Tables

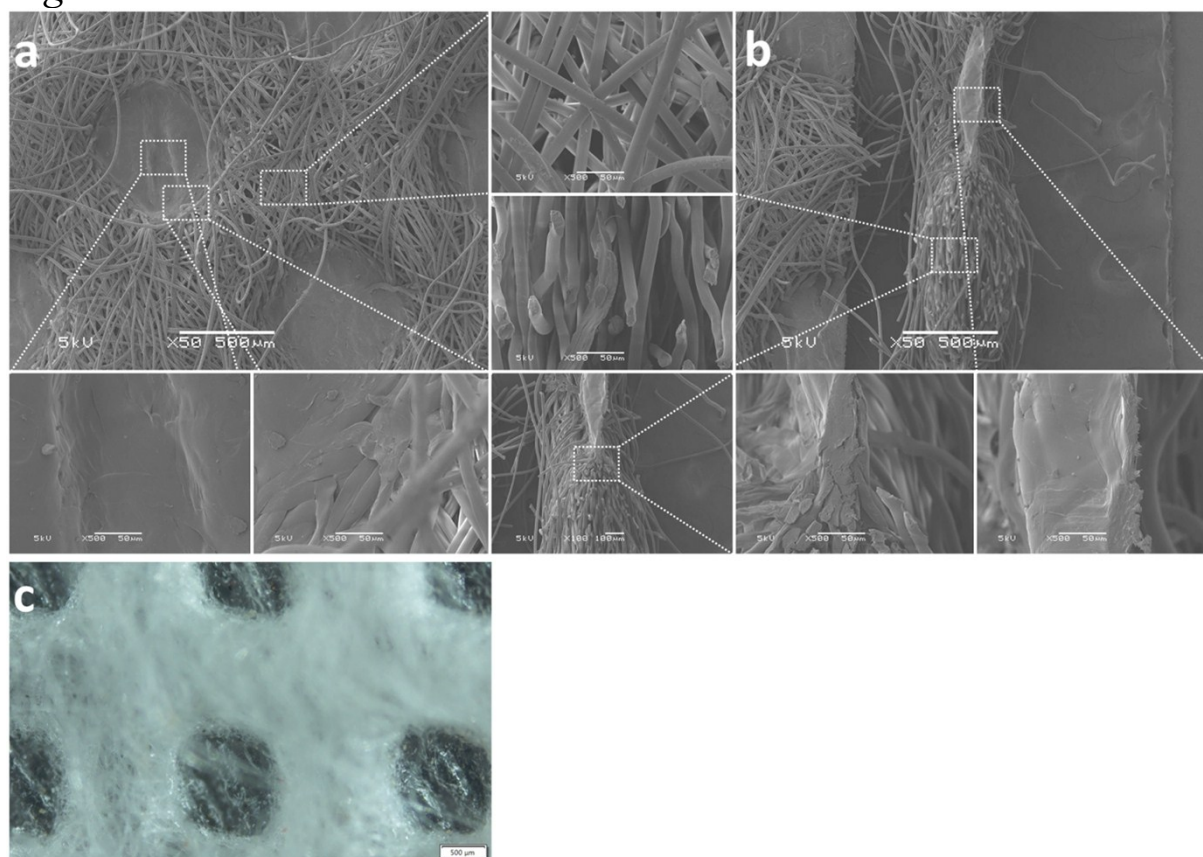

**Fig. S1.** Surface structure characterization. SEM of commercial water-soluble non-woven fabrics: (a) top view, (b) side view. (c) Optical micrographs of commercial water-soluble non-woven fabrics.

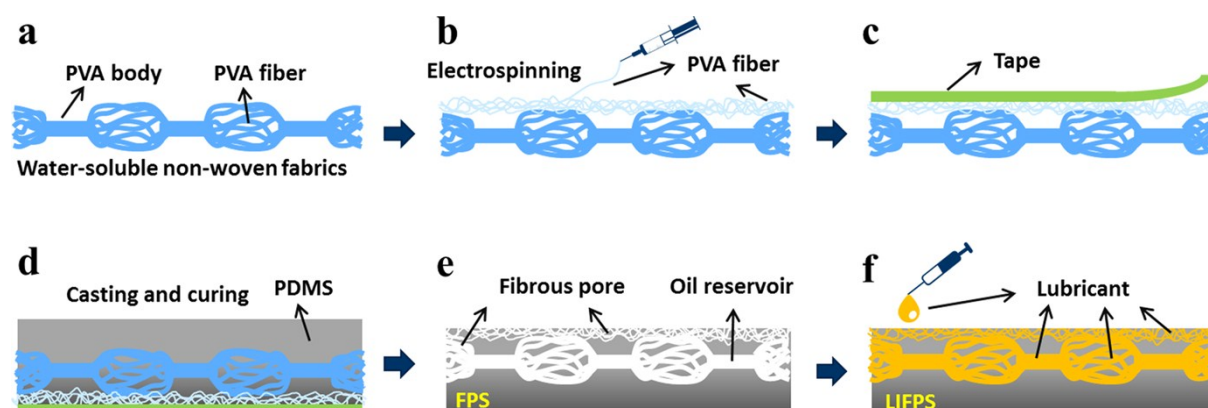

**Fig. S2.** Schematic diagram of the fabrication process: a) Commercial water-soluble non-woven fabrics; b) Forming of surface covering layer by electrospinning; c) Sacrificial template assembled from water-soluble fabrics and tape; d) PDMS casting and curing process; e) Dissolve PVA fibers with water; f) Filling the porous structure with lubricant.

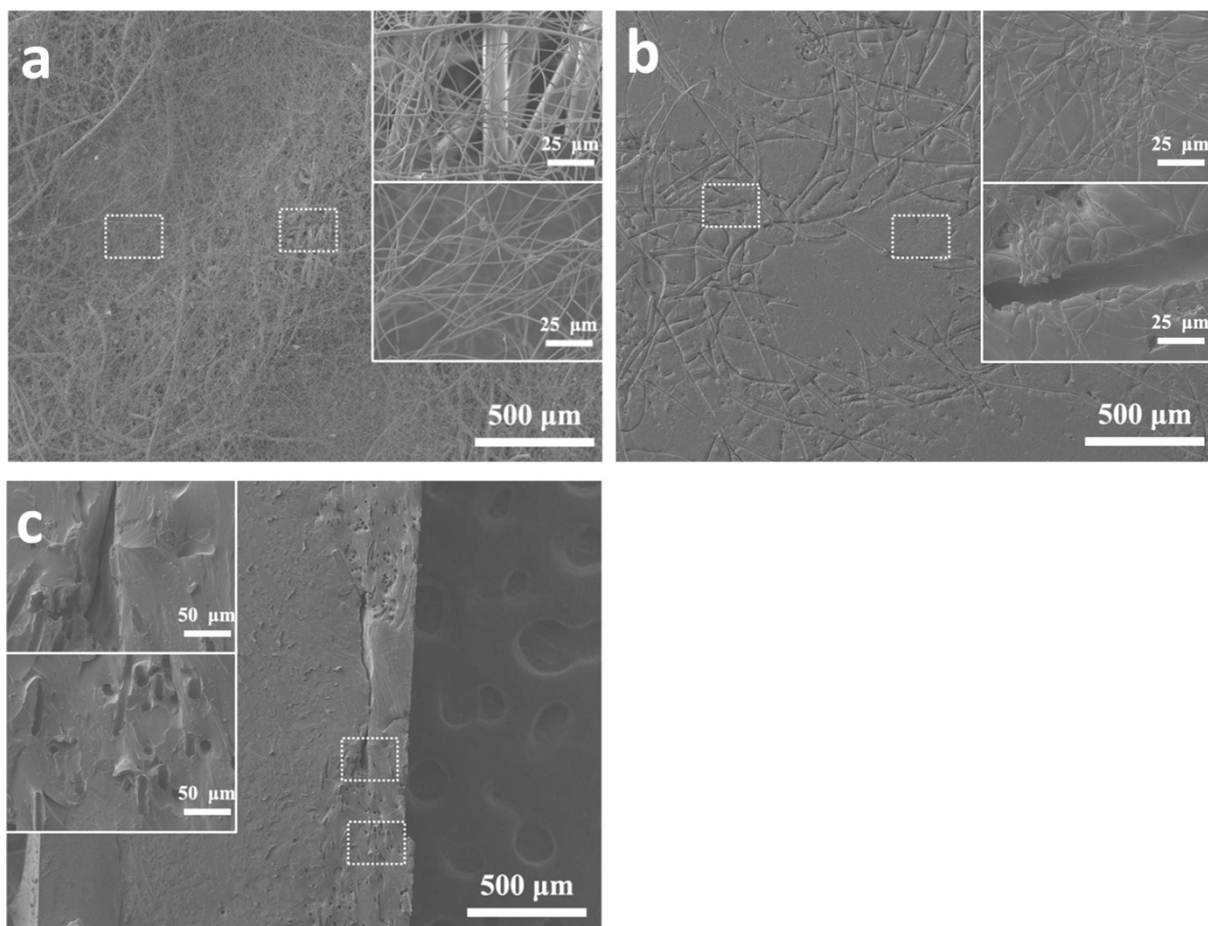

**Fig. S3.** SEM images of a) water-soluble non-woven fabric modified by electrospinning for 5 hours and b) FPS-5, c) Cross-section SEM images of FPS-5.

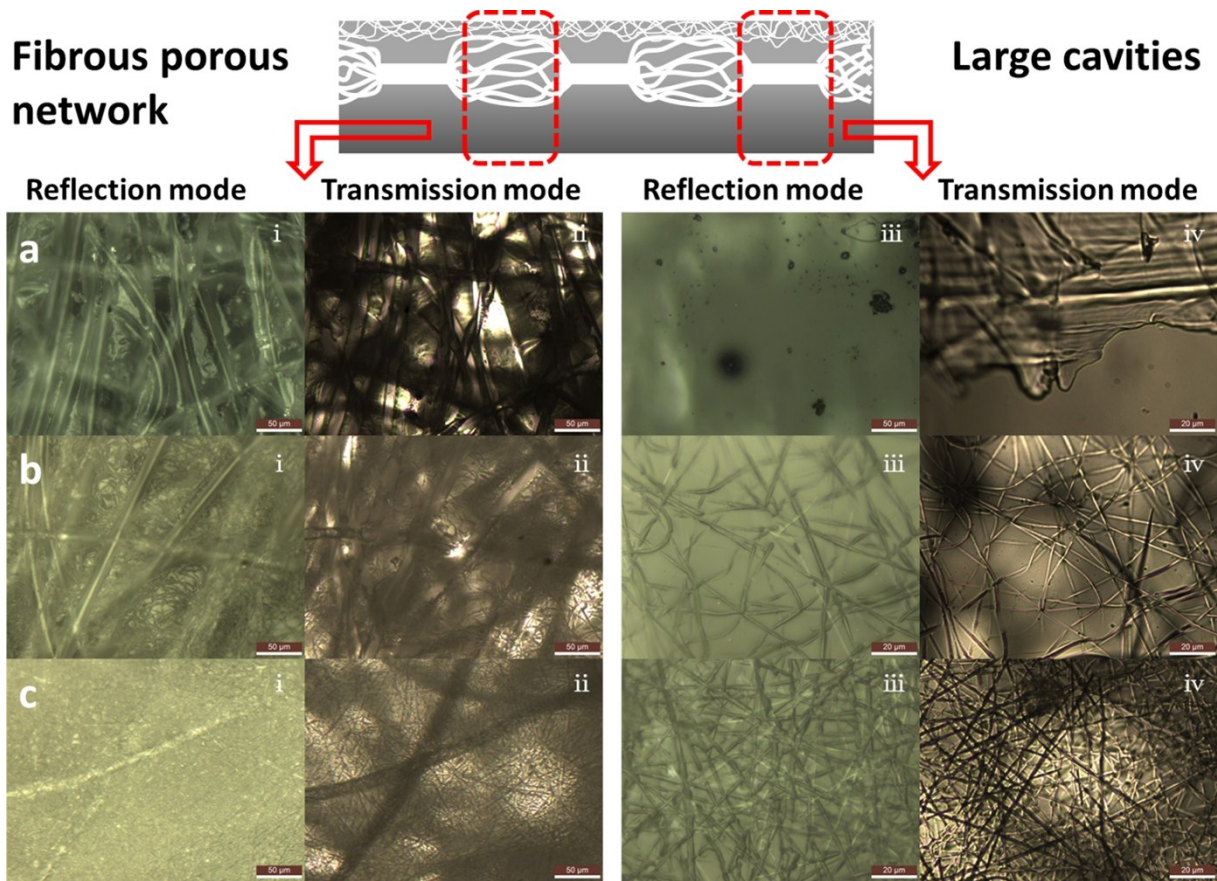

**Fig. S4.** Optical micrograph of the samples in different modes: (a) FPS-0, (b) FPS-5, (c) FPS-25.

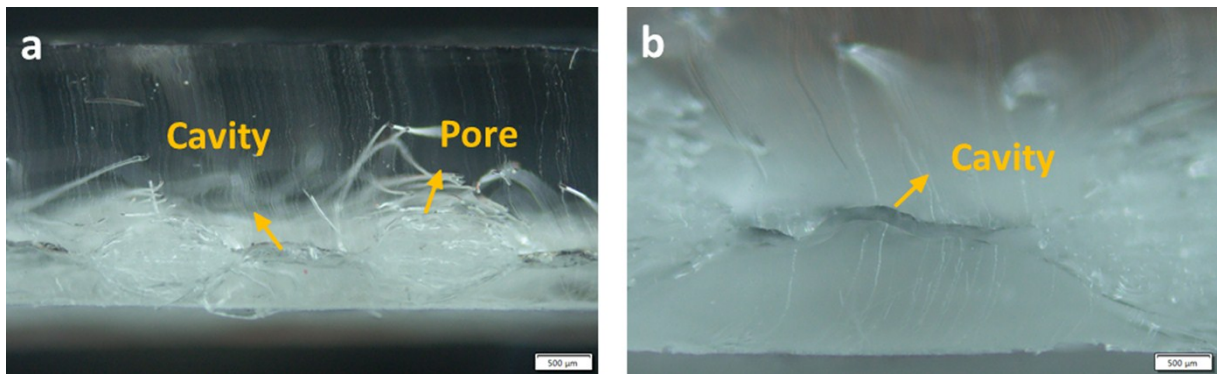

**Fig. S5.** (a) Cross-section optical micrograph of FPS-0. (b) Magnified view of the cavity.



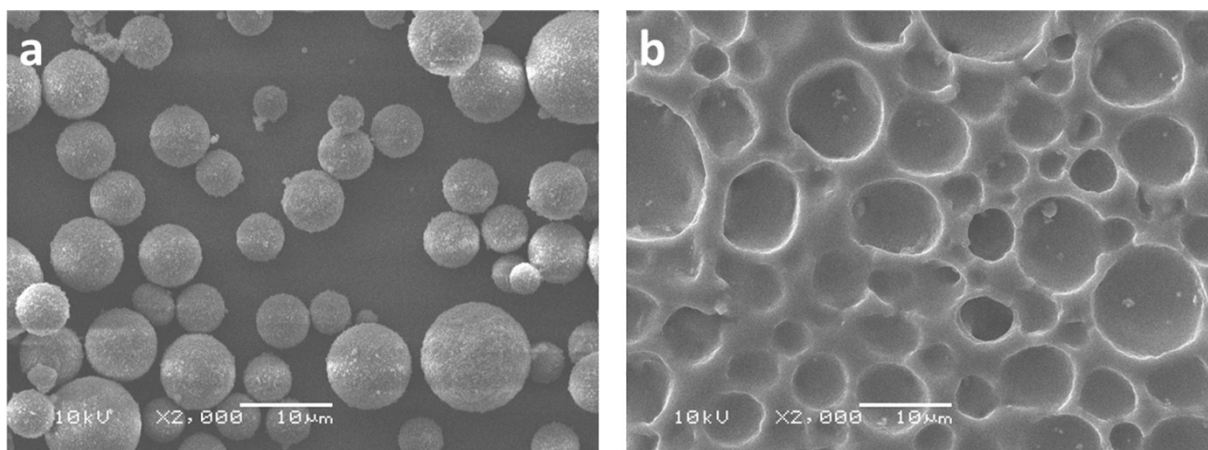

**Fig. S6.** (a) SEM of silica microspheres used to prepare control samples. (b) SEM of control samples.

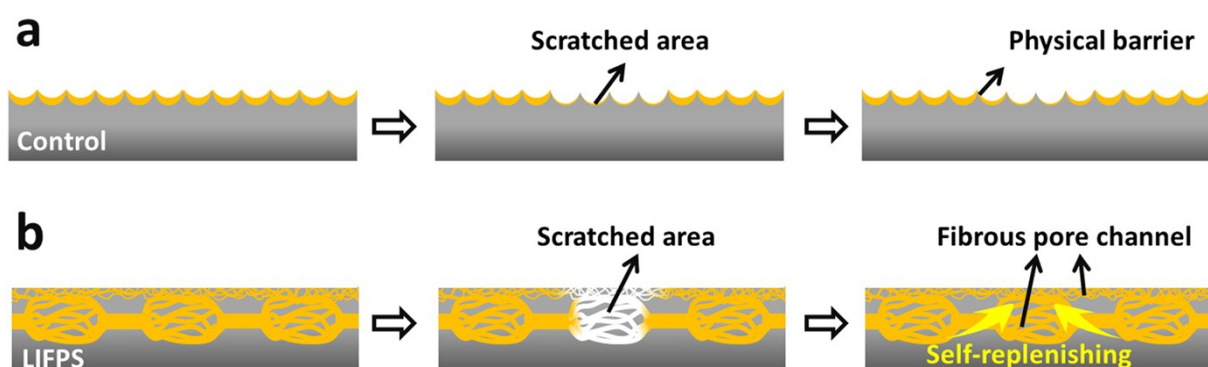

**Fig. S7.** Schematic diagram of the self-replenishing process of a) control sample and b) LIFPS.

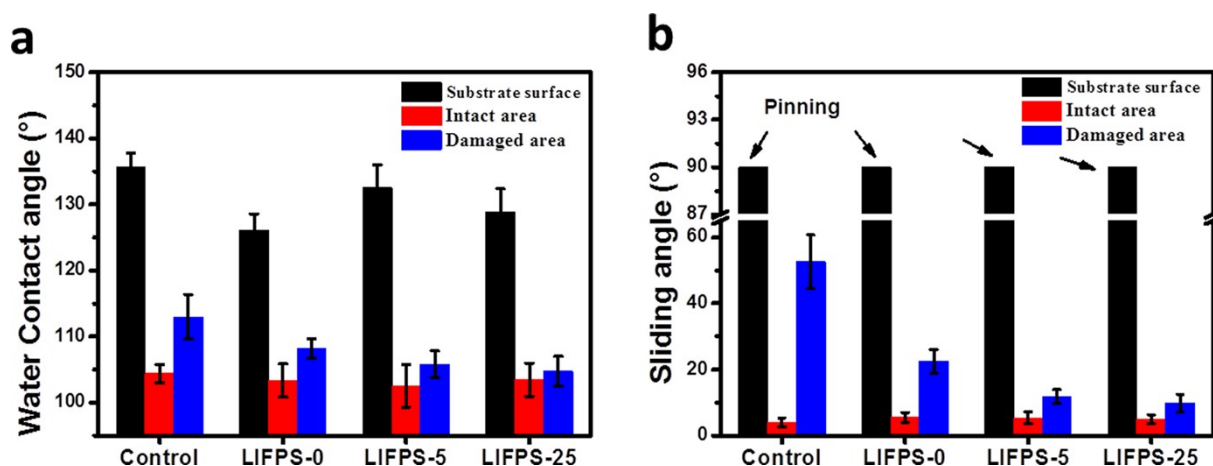

**Fig. S8.** Comparison of a) water contact angle and b) sliding angle on different samples and different area of sample. Silicone oil was selected as lubricant and the volume of water droplets tested was 6  $\mu$ l. The value given is the average of five parallel measurements.
